# Supplementary material
Source: PubMed Central journal article supplement (PMC8444423)
Supplement: NIHMS1739352-supplement-SI.pdf [file NIHMS1739352-supplement-SI.pdf]

# Supporting Information

## Correlation Between Charge Transport and Base Excision

### Repair in the MutY DNA Glycosylase

Ruijie D. Teo,<sup>†,\*</sup> Xiaochen Du,<sup>†,‡</sup> Héctor Luis Torres Vera,<sup>§</sup> Agostino Migliore,<sup>†,¥</sup> David  
N. Beratan<sup>†,^,‡,\*</sup>

<sup>†</sup> Department of Chemistry, Duke University, Durham, North Carolina 27708, United States.

<sup>‡</sup> Department of Computer Science, Duke University, Durham, North Carolina 27708, United States.

<sup>§</sup> Department of Molecular and Cell Biology, University of California, Berkeley, California 94720, United States.

<sup>¥</sup> Present address: Dipartimento di Scienze Chimiche, Università degli Studi di Padova, Padova, Italy.

<sup>^</sup> Department of Physics, Duke University, Durham, North Carolina 27708, United States.

<sup>‡</sup> Department of Biochemistry, Duke University, Durham, North Carolina 27710, United States.

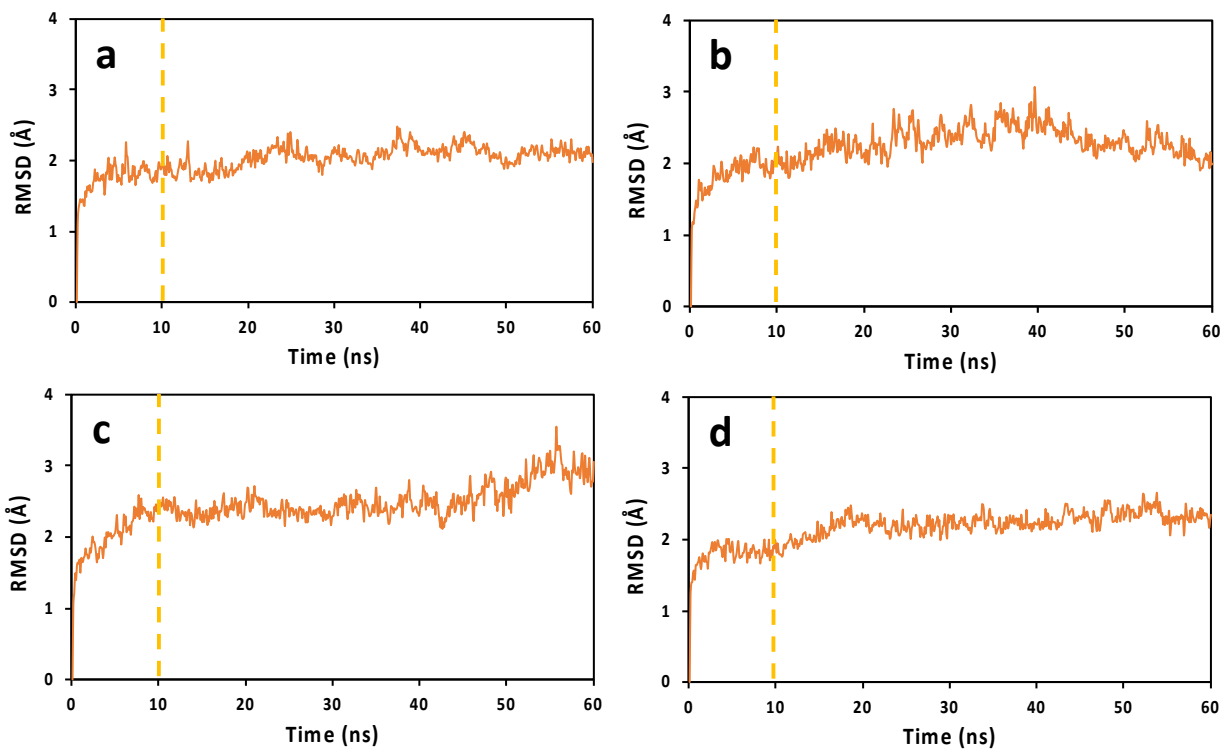

**Figure S1.** RMSD of the MutY-DNA complex during the MD production run for (a, c) the WT protein and (b, d) the R153L mutant, using either (a, b) the A<sub>3+</sub> FF or (c, d) the A<sub>2+</sub> FF to describe the [Fe<sub>4</sub>S<sub>4</sub>] cluster.

**Table S1.** Mean value and standard deviation of the center-to-center distance (in Å) for the indicated redox pairs obtained from MD simulations of the WT-DNA and R153L-DNA complexes using the  $A_{3+}$  FF to describe the  $[Fe_4S_4]$ .

| Redox pair        | WT protein complex | R153L protein complex |
|-------------------|--------------------|-----------------------|
| $[Fe_4S_4]$ -DA18 | $19.25 \pm 0.33$   | $19.49 \pm 1.18$      |
| $[Fe_4S_4]$ -W20  | $10.69 \pm 0.22$   | $10.88 \pm 0.26$      |
| $[Fe_4S_4]$ -DA17 | $21.96 \pm 0.43$   | $23.06 \pm 0.67$      |
| $[Fe_4S_4]$ -DA10 | $25.48 \pm 0.94$   | $25.97 \pm 1.90$      |
| DA18-DA17         | $11.86 \pm 0.30$   | $12.29 \pm 0.46$      |
| DA18-DA10         | $21.82 \pm 0.50$   | $21.65 \pm 0.75$      |
| W20-DA18          | $15.79 \pm 0.40$   | $15.88 \pm 0.54$      |
| W20-DA10          | $27.43 \pm 0.78$   | $27.81 \pm 1.46$      |

**Table S2.** Mean value and standard deviation of the center-to-center distance (in Å) for the indicated redox pairs obtained from MD simulations of the WT-DNA and R153L-DNA complexes using the  $A_{2+}$  FF to describe the  $[Fe_4S_4]$ .

| Redox pair        | WT protein complex | R153L protein complex |
|-------------------|--------------------|-----------------------|
| $[Fe_4S_4]$ -DA18 | $18.79 \pm 1.34$   | $20.44 \pm 0.37$      |
| $[Fe_4S_4]$ -W20  | $10.76 \pm 0.24$   | $11.03 \pm 0.27$      |
| $[Fe_4S_4]$ -DA17 | $21.99 \pm 0.65$   | $22.20 \pm 0.41$      |
| $[Fe_4S_4]$ -DA10 | $22.26 \pm 0.88$   | $21.64 \pm 0.64$      |
| DA18-DA17         | $11.81 \pm 0.62$   | $12.04 \pm 0.41$      |
| DA18-DA10         | $19.28 \pm 1.02$   | $19.83 \pm 0.52$      |
| W20-DA18          | $15.04 \pm 1.37$   | $15.95 \pm 0.45$      |
| W20-DA10          | $24.50 \pm 1.06$   | $23.73 \pm 0.91$      |
